# Supplementary material for: Bone Morphology in 46 BXD Recombinant Inbred Strains and Femur‐Tibia Correlation
Source: Hindawi journal article supplement (doi:10.1155/2015/728278), 2015-01-01
Supplement: f1 [file 728278.f1.pdf]

## APPENDIX B. SUPPOTIVE TABLES FOR DATA ANALYSIS

**Table S1.** Spearman's rank correlation coefficients and significance level of whole bone phenotypes between femur and tibia in RI mice (N>2).

| Strain | N | Length | Length<br>(P-value) | Mineralized<br>Volume | Mineralized<br>Volume<br>(P-value) | mBMD  | mBMD<br>(P-value) |
|--------|---|--------|---------------------|-----------------------|------------------------------------|-------|-------------------|
| B6D2   | 6 | 0.60   | 0.21                | 0.83                  | 0.04                               | -0.09 | 0.87              |
| BXD1   | 5 | 0.90   | 0.04                | 1.00                  | <0.0001                            | 1.00  | <0.0001           |
| BXD100 | 7 | -0.29  | 0.54                | -0.11                 | 0.82                               | 0.25  | 0.59              |
| BXD101 | 3 | 0.50   | 0.67                | 0.50                  | 0.67                               | 1.00  | <0.0001           |
| BXD102 | 6 | -0.49  | 0.33                | 0.14                  | 0.79                               | 0.38  | 0.46              |
| BXD103 | 2 | NA     | NA                  | NA                    | NA                                 | NA    | NA                |
| BXD11  | 3 | 0.50   | 0.67                | 0.50                  | 0.67                               | 1.00  | <0.0001           |
| BXD12  | 5 | -0.40  | 0.50                | -0.10                 | 0.50                               | 0.30  | 0.62              |
| BXD14  | 4 | -0.60  | 0.40                | 0.20                  | 0.80                               | 0.80  | 0.20              |
| BXD24  | 3 | 1.00   | <0.0001             | 1.00                  | <0.0001                            | 1.00  | <0.0001           |
| BXD27  | 5 | 0.10   | 0.87                | 0.80                  | 0.10                               | -0.10 | 0.87              |
| BXD29  | 4 | 0.40   | 0.60                | 0.80                  | 0.20                               | 0.60  | 0.40              |
| BXD31  | 2 | NA     | NA                  | NA                    | NA                                 | NA    | NA                |
| BXD32  | 7 | -0.36  | 0.43                | 0.32                  | 0.48                               | 0.54  | 0.22              |
| BXD34  | 3 | 0.50   | 0.67                | 0.50                  | 0.67                               | -1.00 | <0.0001           |
| BXD38  | 2 | NA     | NA                  | NA                    | NA                                 | NA    | NA                |
| BXD42  | 3 | 1.00   | <0.0001             | 0.50                  | 0.67                               | 0.50  | 0.67              |
| BXD44  | 4 | 1.00   | <0.0001             | 1.00                  | <0.0001                            | -0.40 | 0.60              |
| BXD45  | 2 | NA     | NA                  | NA                    | NA                                 | NA    | NA                |
| BXD48  | 4 | 0.80   | 0.20                | 0.40                  | 0.60                               | 0.80  | 0.20              |

Table S1. (Cont'd).

| Strain | N | Length | Length<br>(P-value) | Mineralized<br>Volume | Mineralized<br>Volume<br>(P-value) | mBMD  | mBMD<br>(P-value) |
|--------|---|--------|---------------------|-----------------------|------------------------------------|-------|-------------------|
| BXD49  | 4 | 0.80   | 0.20                | 0.80                  | 0.20                               | -0.63 | 0.37              |
| BXD50  | 5 | 0.90   | 0.04                | 1.00                  | <0.0001                            | 0.60  | 0.29              |
| BXD56  | 4 | 0.80   | 0.20                | 0.80                  | 0.20                               | -0.40 | 0.60              |
| BXD60  | 7 | 0.93   | <0.01               | 1.00                  | <0.0001                            | 0.46  | 0.29              |
| BXD62  | 8 | 0.91   | <0.01               | 0.83                  | 0.01                               | 0.48  | 0.23              |
| BXD63  | 3 | 1.00   | <0.0001             | 1.00                  | <0.0001                            | 0.50  | 0.67              |
| BXD68  | 4 | 1.00   | <0.0001             | 1.00                  | <0.0001                            | -0.40 | 0.60              |
| BXD69  | 4 | 0.80   | 0.20                | 0.80                  | 0.20                               | 0.40  | 0.60              |
| BXD70  | 7 | 0.21   | 0.65                | 0.61                  | 0.15                               | 0.25  | 0.59              |
| BXD71  | 6 | -0.43  | 0.40                | 0.37                  | 0.47                               | 0.31  | 0.54              |
| BXD73  | 2 | NA     | NA                  | NA                    | NA                                 | NA    | NA                |
| BXD75  | 7 | -0.21  | 0.65                | -0.11                 | 0.82                               | -0.86 | 0.01              |
| BXD79  | 6 | 0.94   | <0.01               | 0.94                  | <0.01                              | -0.43 | 0.40              |
| BXD80  | 8 | -0.16  | 0.71                | 0.60                  | 0.12                               | 0.76  | 0.03              |
| BXD83  | 6 | 0.37   | 0.47                | 0.77                  | 0.07                               | -0.66 | 0.16              |
| BXD84  | 5 | -0.80  | 0.10                | -0.40                 | 0.50                               | 0.30  | 0.62              |
| BXD85  | 3 | 0.50   | 0.67                | 1.00                  | <0.0001                            | 1.00  | <0.0001           |
| BXD87  | 3 | -1.00  | <0.0001             | 0.50                  | 0.67                               | -0.50 | 0.67              |
| BXD89  | 6 | 0.71   | 0.11                | 0.94                  | <0.01                              | 0.26  | 0.62              |
| BXD90  | 9 | 0.90   | <.001               | 0.78                  | 0.01                               | 0.65  | 0.06              |
| BXD92A | 5 | 0.30   | 0.62                | 0.50                  | 0.39                               | 0.40  | 0.50              |
| BXD95  | 5 | 1.00   | <0.0001             | 1.00                  | <0.0001                            | 0.90  | 0.04              |
| BXD97  | 4 | 0.40   | 0.60                | -0.20                 | 0.80                               | 0.40  | 0.60              |

**Table S1.** (Cont'd).

| Strain          | N  | Length | Length<br>(P-value) | Mineralized<br>Volume | Mineralized<br>Volume<br>(P-value) | mBMD  | mBMD<br>(P-value) |
|-----------------|----|--------|---------------------|-----------------------|------------------------------------|-------|-------------------|
| <b>C57BL/6J</b> | 13 | 0.08   | 0.79                | 0.04                  | 0.89                               | -0.13 | 0.67              |
| <b>D2B6F1</b>   | 6  | 0.26   | 0.62                | 0.60                  | 0.21                               | -0.26 | 0.62              |
| <b>DBA2J</b>    | 10 | -0.36  | 0.30                | -0.49                 | 0.15                               | -0.26 | 0.47              |

P values less than 0.05 and their variable values are highlighted with light grey. Only strains with mouse number of 3 or more are used for the analysis.

**Table S2. Spearman's rank correlation coefficients and significance level of cortical bone phenotypes between femur and tibia in RI mice (N>2).**

| Strain | N | Ct. mBMD | Ct. mBMD (P-value) | Ct. Th | Ct. Th (P-value) | CSA   | CSA (P-value) | Ct. Ar | Ct Ar (P-value) |
|--------|---|----------|--------------------|--------|------------------|-------|---------------|--------|-----------------|
| B6D2   | 8 | 0.29     | 0.49               | 0.79   | 0.02             | 0.32  | 0.43          | 0.57   | 0.14            |
| BXD1   | 5 | -0.50    | 0.39               | 0.40   | 0.50             | -0.90 | 0.04          | 0.90   | 0.04            |
| BXD100 | 6 | 0.43     | 0.40               | 0.67   | 0.16             | -0.89 | 0.02          | 0.93   | 0.01            |
| BXD101 | 6 | -0.60    | 0.21               | -0.26  | 0.62             | 0.54  | 0.27          | 0.23   | 0.66            |
| BXD102 | 6 | -0.26    | 0.62               | 0.20   | 0.70             | 0.83  | 0.04          | 0.14   | 0.79            |
| BXD103 | 3 | 0.50     | 0.67               | 0.50   | 0.67             | 0.50  | 0.67          | 0.50   | 0.67            |
| BXD11  | 4 | 0.40     | 0.60               | 1.00   | <0.0001          | 0.60  | 0.40          | 0.60   | 0.40            |
| BXD12  | 5 | -0.50    | 0.39               | 0.60   | 0.28             | -0.30 | 0.62          | 0.10   | 0.87            |
| BXD14  | 5 | -0.80    | 0.10               | 0.00   | 1.00             | -0.30 | 0.62          | 0.70   | 0.19            |
| BXD24  | 5 | -0.90    | 0.04               | -0.60  | 0.28             | 0.30  | 0.62          | 0.70   | 0.19            |
| BXD27  | 4 | 0.20     | 0.80               | 0.80   | 0.20             | -1.00 | <0.0001       | 1.00   | <.0001          |
| BXD29  | 4 | -0.20    | 0.80               | 1.00   | <0.0001          | 0.80  | 0.20          | 0.40   | 0.60            |
| BXD31  | 2 | NA       | NA                 | NA     | NA               | NA    | NA            | NA     | NA              |
| BXD32  | 6 | 0.49     | 0.33               | 0.94   | <0.01            | 0.14  | 0.79          | 0.46   | 0.35            |
| BXD34  | 1 | NA       | NA                 | NA     | NA               | NA    | NA            | NA     | NA              |
| BXD38  | 4 | 0.40     | 0.60               | -0.80  | 0.20             | -1.00 | <0.0001       | 0.20   | 0.80            |
| BXD42  | 4 | 0.40     | 0.60               | 1.00   | <0.0001          | -1.00 | <0.0001       | -0.63  | 0.37            |
| BXD44  | 7 | 0.04     | 0.94               | 0.89   | 0.01             | 0.68  | 0.09          | 0.82   | 0.02            |
| BXD45  | 3 | -0.50    | 0.67               | 1.00   | <0.0001          | -0.50 | 0.67          | -0.50  | 0.67            |
| BXD48  | 7 | 0.32     | 0.48               | 0.96   | <0.001           | 0.80  | 0.02          | 0.89   | 0.01            |
| BXD49  | 7 | -0.50    | 0.25               | 0.75   | 0.05             | 0.71  | 0.07          | 0.96   | <0.001          |
| BXD50  | 5 | 0.50     | 0.39               | 1.00   | <0.0001          | -0.20 | 0.75          | 1.00   | <0.0001         |

Table S2. (Cont'd).

| Strain   | N  | Ct. mBMD | Ct. mBMD (P-value) | Ct. Th | Ct. Th (P-value) | CSA   | CSA (P-value) | Ct. Ar | Ct Ar (P-value) |
|----------|----|----------|--------------------|--------|------------------|-------|---------------|--------|-----------------|
| BXD56    | 5  | 0.40     | 0.50               | 0.90   | 0.04             | 0.90  | 0.04          | 0.82   | 0.09            |
| BXD60    | 6  | 0.14     | 0.79               | 1.00   | <0.0001          | 0.54  | 0.27          | 0.94   | <0.01           |
| BXD62    | 9  | 0.33     | 0.38               | 0.83   | 0.01             | 0.23  | 0.56          | 0.87   | <0.01           |
| BXD63    | 4  | 0.00     | 1.00               | 0.80   | 0.20             | -0.20 | 0.80          | 0.40   | 0.60            |
| BXD68    | 4  | -0.32    | 0.68               | -0.60  | 0.37             | 0.00  | 1.00          | 0.10   | 0.89            |
| BXD69    | 6  | -0.03    | 0.96               | 0.83   | 0.04             | 0.70  | 0.11          | 0.49   | 0.33            |
| BXD70    | 7  | 0.46     | 0.29               | 0.60   | 0.15             | -0.07 | 0.88          | 0.68   | 0.09            |
| BXD71    | 7  | -0.66    | 0.16               | 0.54   | 0.27             | 0.09  | 0.87          | 0.94   | 0.00            |
| BXD73    | 5  | 1.00     | <0.0001            | 0.00   | 1.00             | 0.00  | 1.00          | 0.00   | 1.00            |
| BXD75    | 7  | -0.29    | 0.53               | 0.64   | 0.12             | -0.04 | 0.94          | 0.96   | <0.001          |
| BXD79    | 6  | -0.54    | 0.27               | 0.94   | <0.01            | 0.70  | 0.11          | 1.00   | <0.0001         |
| BXD80    | 9  | -0.05    | 0.90               | 0.37   | 0.33             | -0.55 | 0.13          | 0.47   | 0.21            |
| BXD83    | 7  | -0.36    | 0.43               | 0.25   | 0.59             | 0.27  | 0.55          | 0.46   | 0.29            |
| BXD84    | 5  | 0.80     | 0.10               | 0.00   | 1.00             | -0.30 | 0.62          | -0.10  | 0.87            |
| BXD85    | 3  | 1.00     | <0.0001            | 1.00   | <0.0001          | 0.50  | 0.67          | 1.00   | <.0001          |
| BXD87    | 5  | 0.90     | 0.04               | 0.60   | 0.28             | 0.70  | 0.19          | 0.70   | 0.19            |
| BXD89    | 5  | 0.70     | 0.19               | 0.80   | 0.10             | 0.50  | 0.39          | 0.90   | 0.04            |
| BXD90    | 9  | 0.37     | 0.33               | 0.82   | 0.01             | 0.43  | 0.24          | 0.83   | 0.01            |
| BXD92A   | 5  | -0.50    | 0.39               | -0.10  | 0.87             | -0.10 | 0.87          | 0.50   | 0.39            |
| BXD95    | 5  | 0.90     | 0.04               | 0.70   | 0.19             | 0.70  | 0.19          | 0.70   | 0.19            |
| BXD97    | 4  | 0.80     | 0.20               | 1.00   | <0.0001          | 0.32  | 0.68          | 0.80   | 0.20            |
| C57BL/6J | 12 | 0.12     | 0.70               | 0.29   | 0.37             | 0.20  | 0.50          | 0.40   | 0.15            |
| D2B6F1   | 6  | 0.14     | 0.79               | 0.94   | <0.01            | 0.77  | 0.07          | 0.94   | <0.01           |
| DBA2J    | 11 | -0.01    | 0.98               | -0.06  | 0.85             | -0.28 | 0.41          | -0.18  | 0.59            |

P values less than 0.05 and their variable values are highlighted with light grey.

**Table S3. Spearman's rank correlation coefficients and significance level of cortical bone phenotypes between femur and tibia in RI mice (N>2).**

| Strain                   | N | Trab BV/TV | Trab BV/TV (P-value) | Trab Conn.Dens | Trab Conn.Dens (P-value) | Trab SMI | Trab SMI (P-value) | Trab Th | Trab Th (P-value) | Trab N | Trab N (P-value) | Trab Sp | Trab Sp (P-value) | Trab mBMD | Trab mBMD (P-value) |
|--------------------------|---|------------|----------------------|----------------|--------------------------|----------|--------------------|---------|-------------------|--------|------------------|---------|-------------------|-----------|---------------------|
| <b>BXD1</b>              | 4 | 0.80       | 0.20                 | 0.20           | 0.80                     | 1.00     | <0.0001            | 0.80    | 0.20              | 0.20   | 0.80             | 0.20    | 0.80              | 0.80      | 0.20                |
| <b>BXD38</b>             | 4 | 0.40       | 0.60                 | -0.40          | 0.60                     | 0.40     | 0.60               | 1.00    | <0.0001           | -      | 0.80             | -       | 0.80              | 0.80      | 0.20                |
| <b>BXD45</b>             | 4 | 0.80       | 0.20                 | 1.00           | <0.0001                  | 0.40     | 0.60               | 0.80    | 0.20              | 1.00   | <0.0001          | 0.80    | 0.20              | 0.80      | 0.20                |
| <b>BXD69</b>             | 4 | 1.00       | <0.0001              | 0.80           | 0.20                     | 1.00     | <0.0001            | 0.80    | 0.20              | 0.60   | 0.40             | 0.80    | 2.00              | 0.40      | 0.60                |
| <b>BXD73</b>             | 4 | 0.40       | 0.60                 | 0.40           | 0.60                     | 0.00     | 1.00               | 0.20    | 0.80              | 0.20   | 0.80             | 0.40    | 0.60              | 1.00      | <0.0001             |
| <b>BXD84</b>             | 4 | -0.20      | 0.80                 | 0.20           | 0.80                     | -        | 0.60               | 0.60    | 0.40              | -      | 0.60             | -       | 0.60              | 0.40      | 0.60                |
| <b>BXD95</b>             | 4 | 1.00       | <0.0001              | 0.80           | 0.20                     | 0.80     | 0.20               | 0.80    | 0.20              | 0.80   | 0.20             | 1.00    | <0.0001           | 0.40      | 0.60                |
| <b>BXD97</b>             | 4 | 0.40       | 0.60                 | 0.40           | 0.60                     | -        | 0.60               | 0.40    | 0.60              | 0.40   | 0.60             | 0.40    | 0.60              | 0.40      | 0.60                |
| <b>B6D2</b>              | 5 | 0.60       | 0.28                 | 0.30           | 0.62                     | 0.50     | 0.39               | 0.80    | 0.10              | 0.60   | 0.28             | 0.50    | 0.39              | 0.60      | 0.28                |
| <b>BXD10<sub>1</sub></b> | 5 | -0.10      | 0.87                 | 0.60           | 0.28                     | -        | 0.10               | 0.50    | 0.39              | 0.70   | 0.19             | 0.60    | 0.28              | -0.80     | 0.10                |
| <b>BXD27</b>             | 5 | 0.90       | 0.04                 | 0.80           | 0.10                     | 0.70     | 0.19               | 0.70    | 0.19              | 0.70   | 0.19             | 0.70    | 0.19              | -0.40     | 0.50                |
| <b>BXD48</b>             | 5 | 0.60       | 0.28                 | 0.00           | 1.00                     | -        | 0.39               | 0.90    | 0.04              | 0.00   | 1.00             | 0.00    | 1.00              | -0.30     | 0.60                |
| <b>BXD49</b>             | 5 | 0.90       | 0.04                 | 1.00           | <0.0001                  | 0.90     | 0.04               | 0.30    | 0.62              | 1.00   | <0.0001          | 1.00    | <0.0001           | 0.40      | 0.50                |
| <b>BXD92<sub>A</sub></b> | 5 | 0.05       | 0.90                 | -0.30          | 0.62                     | 0.00     | 1.00               | 0.30    | 0.62              | 0.90   | 0.04             | 0.90    | 0.04              | 0.60      | 0.28                |
| <b>D2B6F<sub>1</sub></b> | 5 | 0.50       | 0.39                 | 0.60           | 0.62                     | 0.50     | 0.39               | 0.00    | 1.00              | 0.20   | 0.74             | 0.20    | 0.75              | 0.60      | 0.28                |
| <b>BXD10<sub>0</sub></b> | 6 | 0.83       | 0.04                 | 0.30           | 0.54                     | 0.20     | 0.70               | 0.54    | 0.27              | 0.94   | <0.05            | 0.89    | 0.02              | 0.14      | 0.79                |
| <b>BXD12</b>             | 6 | 0.60       | 0.21                 | 0.66           | 0.16                     | 0.50     | 0.27               | 0.67    | 0.15              | 0.83   | 0.04             | 0.83    | 0.04              | 0.20      | 0.70                |

|                    |   |       |       |      |      |           |      |           |      |      |       |      |       |       |      |
|--------------------|---|-------|-------|------|------|-----------|------|-----------|------|------|-------|------|-------|-------|------|
| <b>BXD62</b>       | 6 | 0.71  | 0.11  | 0.89 | 0.02 | 0.83      | 0.04 | 0.03      | 0.96 | 0.83 | 0.04  | 0.77 | 0.07  | 0.60  | 0.21 |
| <b>BXD71</b>       | 6 | 0.94  | <0.05 | 0.43 | 0.40 | 0.54      | 0.27 | -<br>0.26 | 0.62 | 0.70 | 0.11  | 0.94 | <0.01 | 0.60  | 0.21 |
| <b>BXD79</b>       | 6 | 0.54  | 0.27  | 0.43 | 0.40 | 0.14      | 0.79 | 0.26      | 0.62 | 0.94 | <0.05 | 0.89 | 0.02  | 0.66  | 0.16 |
| <b>BXD80</b>       | 6 | 0.54  | 0.27  | 0.89 | 0.02 | 0.77      | 0.07 | 0.09      | 0.87 | 0.83 | 0.04  | 0.84 | 0.04  | 0.37  | 0.47 |
| <b>BXD10<br/>2</b> | 7 | -0.20 | 0.67  | 0.36 | 0.40 | -<br>0.07 | 0.88 | -<br>0.07 | 0.88 | 0.18 | 0.70  | 0.11 | 0.82  | 0.29  | 0.53 |
| <b>BXD32</b>       | 7 | 0.82  | 0.02  | 0.43 | 0.34 | 0.89      | 0.01 | 0.54      | 0.22 | 0.54 | 0.22  | 0.46 | 0.29  | -0.09 | 0.85 |

**Table S3. (Cont'd).**

| Strain               | N | Trab<br>BV/T<br>V | Trab<br>BV/T<br>V (P-<br>value) | Trab<br>Conn.Den<br>s | Trab<br>Conn.Den<br>s (P-value) | Trab<br>SMI | Trab<br>SMI (P-<br>value) | Trab<br>Th | Trab<br>Th (P-<br>value) | Trab<br>N | Trab<br>N (P-<br>value) | Trab<br>Sp | Trab<br>Sp (P-<br>value) | Trab<br>mBM<br>D | Trab<br>mBM<br>D (P-<br>value) |
|----------------------|---|-------------------|---------------------------------|-----------------------|---------------------------------|-------------|---------------------------|------------|--------------------------|-----------|-------------------------|------------|--------------------------|------------------|--------------------------------|
| <b>BXD60</b>         | 7 | 0.79              | 0.04                            | 0.64                  | 0.12                            | 0.86        | 0.01                      | 0.74       | 0.06                     | 0.64      | 0.12                    | 0.64       | 0.12                     | 0.79             | 0.04                           |
| <b>BXD70</b>         | 7 | 0.86              | 0.01                            | 0.75                  | 0.05                            | 0.82        | 0.02                      | 0.60       | 0.15                     | 0.70      | 0.07                    | 0.64       | 0.12                     | 0.60             | 0.15                           |
| <b>BXD83</b>         | 7 | 0.36              | 0.43                            | 0.68                  | 0.09                            | 0.57        | 0.18                      | 0.07       | 0.88                     | 0.68      | 0.09                    | 0.68       | 0.09                     | 0.25             | 0.59                           |
| <b>BXD89</b>         | 7 | 0.89              | 0.01                            | 0.96                  | <0.001                          | 0.86        | 0.01                      | 0.75       | 0.05                     | 0.93      | <0.05                   | 0.93       | <0.05                    | 0.00             | 1.00                           |
| <b>C57BL/6<br/>J</b> | 8 | 0.36              | 0.39                            | 0.17                  | 0.69                            | -<br>0.05   | 0.90                      | 0.48       | 0.23                     | 0.24      | 0.57                    | 0.29       | 0.49                     | 0.00             | 1.00                           |
| <b>DBA2J</b>         | 8 | 0.43              | 0.29                            | 0.62                  | 0.10                            | -<br>0.17   | 0.69                      | 0.31       | 0.45                     | 0.52      | 0.18                    | 0.64       | 0.09                     | 0.24             | 0.57                           |
| <b>BXD90</b>         | 9 | 0.53              | 0.14                            | 0.28                  | 0.46                            | 0.75        | 0.02                      | 0.70       | 0.04                     | 0.57      | 0.11                    | 0.73       | 0.03                     | -0.20            | 0.59                           |

P values less than 0.05 and their variable values are highlighted with light grey. Trab BV/TV = Trabecular bone volume density, or bone volume ratio, Trab Conn.Dens = Trabecular connectivity density, Trab SMI = Trabecular structural Model Index, Trab Th = Trabecular thickness, Trab N = Trabecular number, Trab Sp = Trabecular space, Trab mBMD = Material bone mineral density.
